# Supplementary material for: Host-probiotic interaction: new insight into the role of the endocannabinoid system by in vivo and ex vivo approaches
Source: PubMed Central journal article supplement (PMC5430882; doi:10.1038/s41598-017-01322-1), 2017-04-28
Supplement: 41598_2017_1322_MOESM1_ESM.pdf [file 41598_2017_1322_MOESM1_ESM.pdf]

## Host-probiotic interaction: new insight into the role of the endocannabinoid system by in vivo and ex vivo approaches.

Giorgia Gioacchini<sup>1</sup>, Giacomo Rossi<sup>2†</sup>, and Oliana Carnevali<sup>1,3†\*</sup>

1.Dipartimento Scienze della Vita e dell’Ambiente, Università Politecnica delle Marche, Via Brecce Bianche, 60131 Ancona, Italy;

2.Scuola di Bioscienze e Medicina Veterinaria, Università degli Studi di Camerino, Via Fidanza 15, 62024 Matelica (MC), Italy.

3.INBB Consorzio Interuniversitario di Biosistemi e Biostrutture, 00136 Roma, Italy.

| Histology           | Control          | VSL#3            | P value |
|---------------------|------------------|------------------|---------|
| Enterocytes length  | 37.82 ± 1.97 µm  | 48.31 ± 1.93µm   | <0.001  |
| Villi length        | 0.839 ± 0.085 µm | 1.200 ± 0.146 µm | <0.001  |
| Crypt depth         | 0.088±0.081      | 0.100±0.022      | 0.202   |
| Villi/cryptae ratio | 12.8±3.73        | 14.2±5.51        | 0.016   |

**Table 1S:** Tabulation and statistical evaluation of enterocyte length, villus height, crypt depth and villus height/crypt depth ratio found in the front intestinal tracts. Values indicate mean ± SD, statistical differences were tested by variance analysis and confirmed by non-parametric methods (Wilcoxon).

| <b>Gene</b>   | <b>Forward</b>           | <b>Reverse</b>             |
|---------------|--------------------------|----------------------------|
| <i>cnr1</i>   | TCTGTGGGAAGCCTGTTTC      | ACCGAGTTGAGCCGTTTG         |
| <i>cnr2</i>   | TCAGAGAGACGATGCTAACC     | CAAAAGGCTTCCCACAGAG        |
| <i>trpv1</i>  | TGATCGTCGCTGGTGCTT       | GACTGGGCTCTCTCTGAACG       |
| <i>faah</i>   | CATTCTCGGACCAGCCTTCA     | CCTTCACTGCCTGTTGGAAGA      |
| <i>abhd4</i>  | GAAGAGCAGTTTGTTCCTCCATAG | GACTCACTCTTTCTGGGTATTGGAT  |
| <i>mgll</i>   | CGAGAGGCCGCAGGATTTTA     | TGAGTTTAGGAGCCAAGCG        |
| <i>il1</i>    | GCTGGGGATGTGGACTTC       | GTGGATTGGGGTTTGATGTG       |
| <i>tnfa</i>   | TTGTGGTGGGTTTGATG        | TTGGGGCATTATTTTGTAAAG      |
| <i>myd88</i>  | CAGCGACATCCAGTTTGTGC     | GCGGCACCTCTTTTCGATGA       |
| <i>il10</i>   | GCCGTGGAGCAGGTGAAG       | GAAGATGTCAAACCTCACTCATGGCT |
| <i>casp1</i>  | AGAAAACGACTGGCCTTGCT     | TGAGCAAAGTCCCTGATGGC       |
| <i>nos2a</i>  | CAAACCTCTACAGCGGCGG      | GAGTACAGACGGGGCTTCAG       |
| <i>tgfb1a</i> | CGTCTTCCAGCAAGCTCAGA     | TGGAGACAAAGCGAGTTCCC       |
| <i>nfkb</i>   | GGCCAAAGACACTGTTCCGA     | AGGACTTGCGGTTCTTCTCG       |
| <i>tlr1</i>   | CGGGAAAAACCATCGTGCAA     | TAGTGGCACCATTGCTCTG        |
| <i>tlr2</i>   | CTGTCCGAGCACTTTGTGAG     | CCACAACAGCTTAACACTCGTC     |
| <i>tlr3</i>   | GACTACGTGATAGTCCGCC      | ACAAGCGTAGAACAAGGGCA       |
| <i>tlr9</i>   | GGATTCTGGAGTCTCGTGC      | CTGCTGCACCAAAGGAAGG        |
| <i>casp3</i>  | CCGCTGCCCATCACTA         | ATCCTTTCACGACCATCT         |
| <i>baxa</i>   | GGCTATTTCAACCAGGGTTCC    | TGCGAATCACCAATGCTGT        |
| <i>bcl2a</i>  | CCTTCAATAAAGCAGTGGAGGAA  | CGGGCTATCAGGCATTCAGA       |
| <i>act1b</i>  | GGTACCCATCTCCTGCTCAA     | GAGCGTGGCTACTCCTTAC        |
| <i>rplp</i>   | CTGAACATCTCGCCCTTCTC     | TAGCCGATCTGCAGACACAC       |

**Table 2S:** Lists of primers used in gene expression analyses by Real-Time qPCR.
